## Retraction

# Retraction: The protective effect of PPAR $\gamma$ in sepsis-induced acute lung injury via inhibiting PTEN/ $\beta$ -catenin pathway

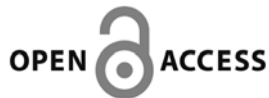

This Retraction follows an Expression of Concern relating to this article previously published by Portland Press.

This article is being retracted from *Bioscience Reports* at the request of the authors following receipt of a notification from a reader, alerting the authors to duplications in Figures 2C, 5A and 5C.

The authors are unable to correct the article and wish to retract the article. The Editor-in-Chief and Editorial Board agree with the retraction.

Version of Record published:  
19 April 2021
